# Supplementary material
Source: Research Square preprint supplement (doi:10.21203/rs.3.rs-10015807/v1)
Supplement: Supplementary file 1 [file 88c70cc27f87c4bf3de3061a.docx]

**Table 3**

*Measurement invariance in the 2 correlated factor model (software package lavaan)*

|  | **Invariance Level** | ***X2*** | ***df*** | ***p*** | ***CFI*** | ***TLI*** | ***RMSEA*** | ***SRMR*** |
| --- | --- | --- | --- | --- | --- | --- | --- | --- |
| **Type of sample (non-clinical n=220 / clínical n=195)** | 1. Configural Invariance | 410.896 | 302 |  | 0.989 | 0.988 | 0.042 | 0.072 |
| 2. Metric Invariance | 480.147 | 320 | <0.001 | 0.983 | 0.981 | 0.052 | 0.082 |
| 3. Scalar Invariance | 679.019 | 394 | <0.001 | 0.969 | 0.973 | 0.062 | 0.083 |
| **Gender**  **(boys n=206 / girls n= 209)** | 1. Configural Invariance | 447.855 | 302 |  | 0.985 | 0.983 | 0.048 | 0.075 |
| 2. Metric Invariance | 479.543 | 320 | 0.024 | 0.982 | 0.981 | 0.052 | 0.082 |
| 3. Scalar Invariance | 646.209 | 394 | <0.001 | 0.972 | 0.976 | 0.059 | 0.080 |
| **Age**  **(<12 years old n=147 / ≥12 years old n=268)** | 1. Configural | 469.897 | 302 |  | 0.984 | 0.981 | 0.052 | 0.077 |
| 2. Metric | 509.810 | 320 | 0.002 | 0.981 | 0.980 | 0.054 | 0.080 |
| 3. Scalar | 659.798 | 394 | <0.001 | 0.974 | 0.977 | 0.057 | 0.07 |

Note: df=degrees of freedom.
